# Supplementary material for: Differences in flavonoid pathway metabolites and transcripts affect yellow petal colouration in the aquatic plant Nelumbo nucifera
Source: PubMed Central journal article supplement (PMC6592004; doi:10.1186/s12870-019-1886-8), 2019-06-24

a

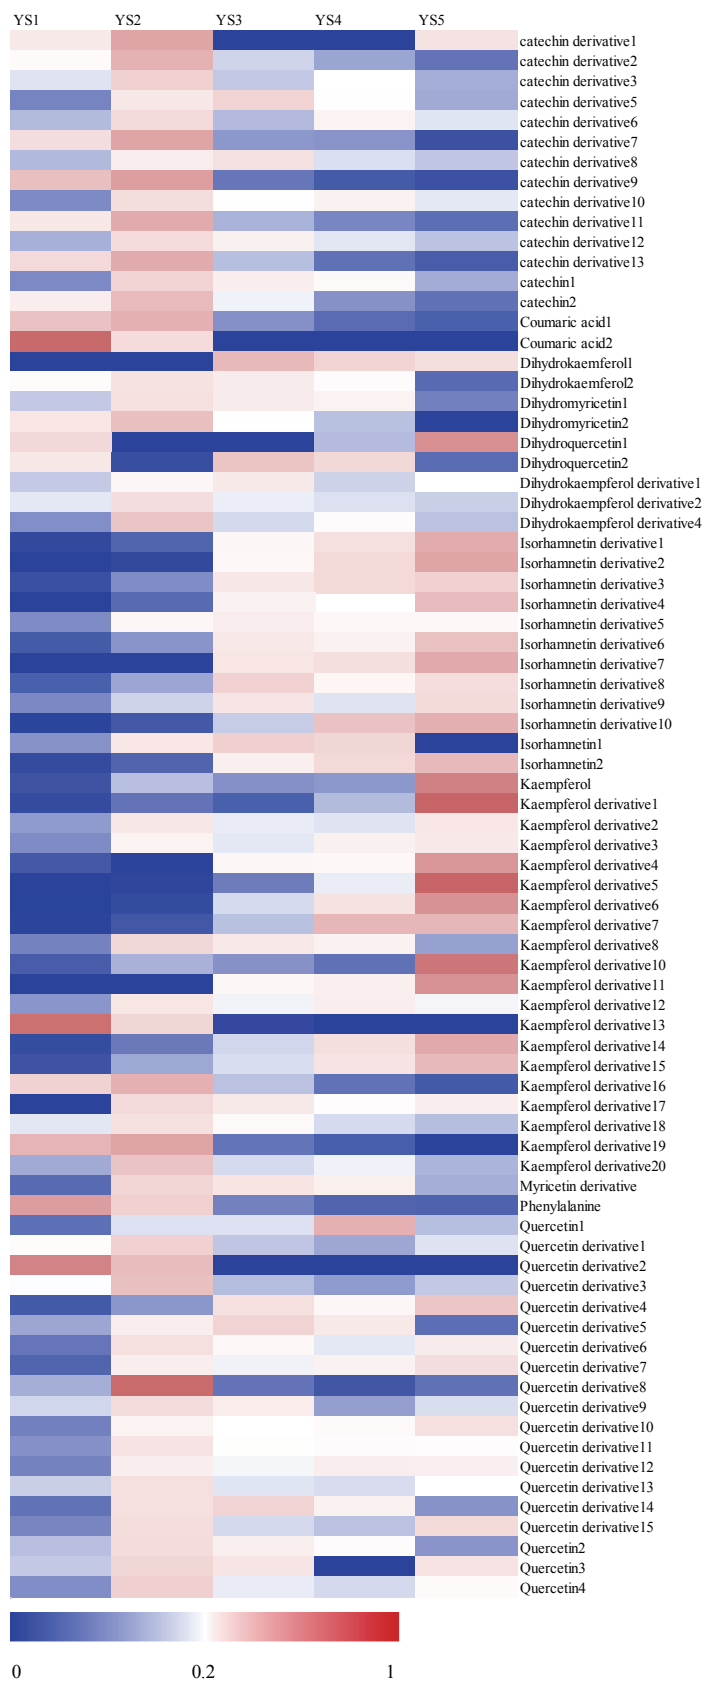

b

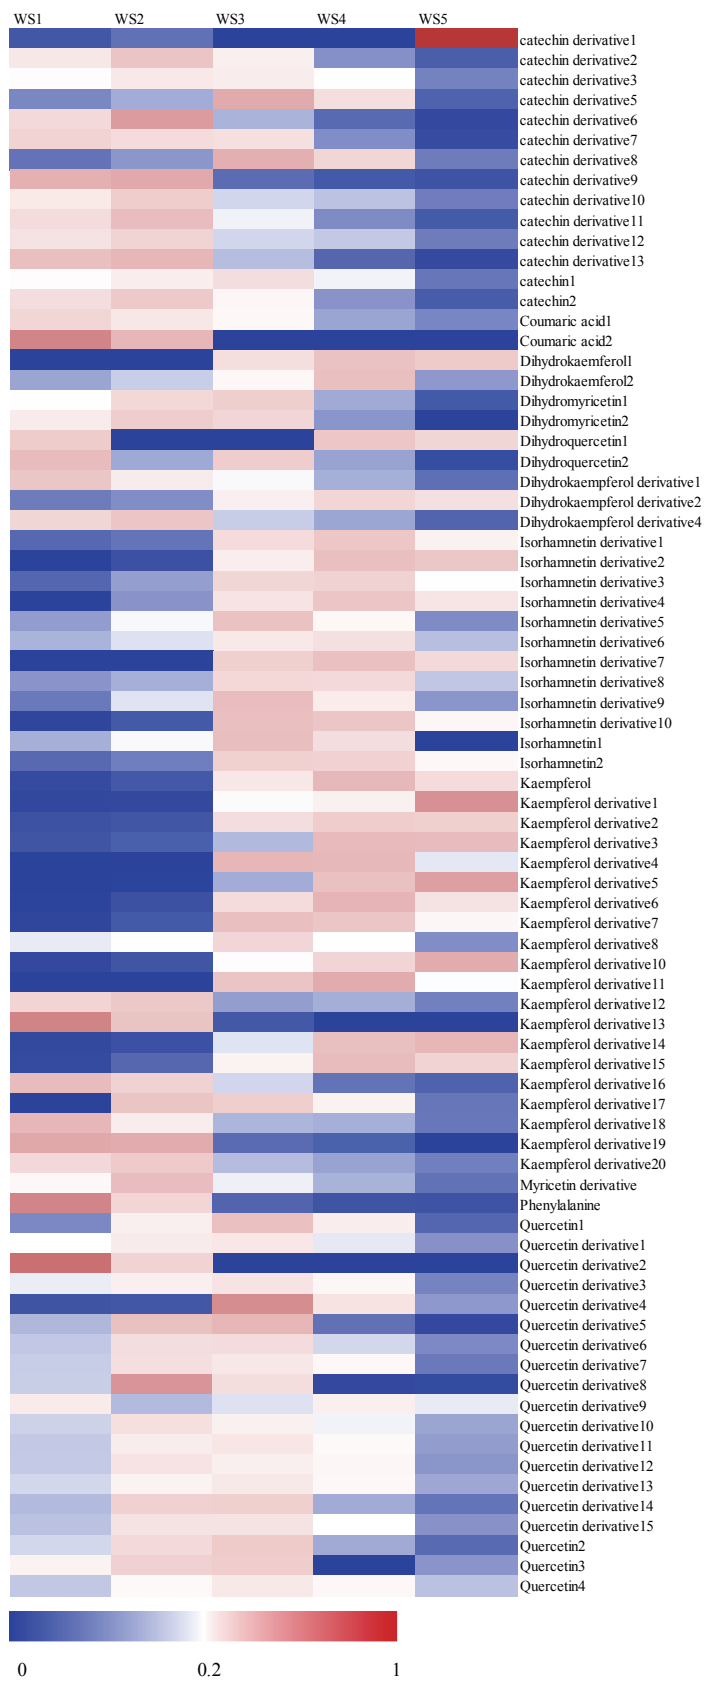

Supplement: 12870_2019_1886_MOESM5_ESM.pdf [file 12870_2019_1886_MOESM5_ESM.pdf]
