# Supplementary material for: Differences in flavonoid pathway metabolites and transcripts affect yellow petal colouration in the aquatic plant Nelumbo nucifera
Source: BMC Plant Biol. 2019 Jun 24;19:277. doi: 10.1186/s12870-019-1886-8 (PMC6592004; doi:10.1186/s12870-019-1886-8)
Supplement: Supplementary file 2 — Table S2. Compounds identified in lotus during flower colouration stages measured by GC-MS. (XLS 11 kb) [file 12870_2019_1886_MOESM2_ESM.xls]

## Sheet: Sheet1
Table S2. Compounds identified in lotus during flower colouration stages measured by GC-MS.
No.	Compound name	RI	RT	Quantification mass (m/z)
1	Boric acid	1010	7.32	73133221263
2	Lactic Acid	1066	9.67	73117191
3	L-Valine	1094	10.37	72146
4	Oxalic acid	1136	12.21	73147190
5	Pipecolic acid	1268	12.84	56,84,186
6	L-Isoleucine	1179	13.16	86146
7	4-Hydroxybutanoic acid	1238	15.03	73147233
8	L-Serine	1252	15.66	73116147
9	Silanol	1286	16.28	73133299
10	Glycerol	1289	16.36	73147205293
11	L-Threonine	1292	16.77	73117219
12	Butanedioic acid	1321	17.25	73147247
13	Glyceric acid	1344	17.94	73147189292
14	2-Butenedioic acid	1353	18.16	73147245
15	Nonanoic acid	1355	18.41	73117215
16	Serine	1368	18.71	73147204278
17	L-Aspartic acid	1420	20.2	73160245
18	β-Alanine	1433	20.33	73174248290
19	Malic acid		22.05	73147189233335
20	L-5-Oxoproline	1522	22.69	73156258
21	4-Aminobutanoic acid	1541	22.91	73174216304
22	L-Threonic acid	1523	23.99	73147205292409
23	L-(+)-Tartaric acid	1622	24.93	73147219292423
24	L-Glutamic acid	1651	25.13	73128246348
25	2-Keto-l-gluconic acid		28.41	73147217292421
26	Terephthalic acid	1788	28.69	103140221295
27	Shikimic acid	1794	29.42	73204255357462
28	D-Psicofuranose	1837	29.53	73147217257437
29	Citric acid	1839	29.66	73147273363465
30	2-Ketoglutaric acid	1621	30.2	73173246
31	D-Allofuranose	1853	30.37	73147217319393
32	Quininic acid	1851	30.66	255345435537
33	D-(-)-Fructose	1869	30.97	307364464554
34	D-Glucose	1883	31.48	205319364464
35	L-Tyrosine	1959	31.89	73218280354
36	Ascorbic acid	1971	32.26	73147205332374
37	Palmitic Acid	2050	33.62	73117201313
38	Myo-Inositol	2113	35.07	73147217305432
39	Linoelaidic acid		36.61	73262337
40	α-Linolenic acid	2218	36.73	73335
41	Stearic acid	2246	37.16	73117201341
42	1-Monopalmitin	2607	42.86	73147239371459
43	D-Lactose	2675	43.03	204319361451539
44	Sucrose	2661	44.34	217271319361437
45	Glycerol monostearate	2806	45.64	203267399487
46	Sebacic acid	3332	49.27	138229369462
